# Supplementary material
Source: PubMed Central journal article supplement (PMC1595455)
Supplement: pnas_0604891103_1.pdf [file pnas_0604891103_1.pdf]

\* \* \* \* \*  
 NleG1<sub>CIROD</sub> LQTRISECTFSV**SQEK**LQCP**EEEMR**CPV**TLET**PE**KG**V**FV**KNSGDS**SV**CT**LFD**SS**SF**S**R**LV**RD**GGV**HPL**T**REP**IKAS**MIV**SS**DK**CV**YD**NA**KGN**F**VI**KNS--- 97-194  
 NleG1<sub>EPEC2</sub> LQARISECAF**SV**SQ**EN**LQCP**EEGKR**CPV**TLET**P**ETG**V**FV**K**NSE**GL**SV**CT**LFD**SV**S**I**S**R**LV**REGGV**HPL**T**RET**ITPS**MIV**K**PED**CI**FD**SS**KGN**F**II**KDG--- 92-189  
 NleG2-4<sub>SAKAI</sub> IEGKISQ**CK**F**S**V**NT**ESLQCP**SEAVR**CP**IIL**DK**PEEG**V**FV**K**NSE**GL**SV**CT**LFD**SV**S**F**S**H**LV**RDGG**KHPL**T**REP**ITSS**MIV**SQ**EQ**CI**YD**Q**T**K**GN**F**VI**KDK--- 94-191  
 NleG2<sub>EPE69</sub> IEGKISQ**YK**F**S**V**NT**Q**SL**QCP**SEAVR**CP**IIL**DK**PEEG**V**FV**K**NSE**D**SLV**CT**LFD**SV**S**F**S**H**LV**RDGG**RHPL**T**REP**ITSS**MIV**S**PEQ**CI**YD**Q**A**K**GN**F**VI**KDK--- 95-192  
 NleG2-1<sub>EPE22</sub> PQDKI**Y**Q**CK**F**S**V**NT**ESLQCP**S**D**ATR**CP**IIL**ET**PEEG**V**FV**K**NS**DS**SAV**CT**LFD**VD**AL**S**R**V**ND**GS**VHPL**T**RTP**ITPS**MIV**K**PEE**CK**YD**P**ARG**S**FI**KDS--- 96-193  
 NleG2-2<sub>EPE22</sub> IQSKI**S**Q**YK**F**S**V**CP**ERLQCP**P**ESA**Q**CP**IT**LE**I**PE**EG**V**F**I**K**NSGDS**V**CS**LFD**VT**AF**S**R**LV**SE**KSP**HPL**T**REK**L**TAS**M**V**S**AD**CK**F**Y**DH**G**K**S**F**VIKDS--- 94-191  
 NleG2-4<sub>EPE22</sub> IEGKISQ**CK**F**S**V**NT**ESLQCP**SEAVR**CP**IIL**DK**PEEG**V**FV**K**NSE**GL**SV**CT**LFD**SV**S**F**S**H**LV**RDGG**KHPL**T**REP**ITSS**MIV**SQ**EQ**CI**YD**Q**T**K**GN**F**VI**KDK--- 94-191  
 NleG2-5<sub>EPE22</sub> IEGKISQ**CK**F**S**V**NT**ESLQCP**SE**EV**R**CP**IIL**DK**PEEG**V**FV**K**NSE**GL**SV**CT**LFD**S**I**S**F**S**H**LV**RD**GG**KHPL**T**REP**ITSS**MIV**SQ**EQ**CI**YD**Q**T**K**GN**F**VI**K---- 94-189  
 NleG3-1<sub>EPE22</sub> LQAKI**S**E**CT**F**T**V**D**IE**KL**H**CP**GE**V**LQ**CP**IT**LE**Q**PE**K**G**I**F**V**K**NSD**GS**D**VC**T**LFD**AA**AF**S**R**L**T**GE**GL**P**HPL**T**REP**ITAS**I**V**K**HE**EC**I**YD**D**T**R**GN**F**VI**KGN--- 98-195  
 NleG3-2<sub>EPE22</sub> LQAKI**S**E**CT**F**T**V**D**IE**KL**H**CP**GE**V**LQ**CP**IT**LE**Q**PE**K**G**I**F**V**K**NSD**GS**D**VC**T**LFD**AA**AF**S**R**L**T**GE**GL**P**HPL**T**REP**ITSS**MIV**SQ**EQ**CI**YD**Q**T**K**GN**F**VI**K---- 98-193  
 NleG4<sub>EPE22</sub> ICYK**I**L**S**SS**F**P**V**H**SE**E**V**F**F**P**K**EHL**K**CP**IIL**DA**PN**G**V**F**I**KNS**V**SA**K**VC**N**LY**D**K**N**AM**L**K**L**V**I**SG**S**P**HPL**S**REP**ITES**M**I**M**R**K**DE**CY**F**D**P**K**TES**F**V**ND**V--- 99-196  
 NleG5<sub>SAKAI</sub> LLDK**I**EV**CA**F**N**VE**HA**Q**L**Q**V**PE**S**L**R**T**CP**V**T**L**CE**P**ED**G**V**F**M**R**NS**M**NS**N**V**C**M**LY**D**K**M**AL**I**HL**V**K**T**RA**A**H**PL**S**S**RES**IA**VS**M**I**V**GR**DN**CA**FD**P**D**R**GN**F**V**L**KN**---- 117-213  
 NleG6-1<sub>SAKAI</sub> LMEK**I**NS**CL**F**R**P**D**SN**H**F**S**CP**E**S**FL**T**CP**IT**L**D**T**P**ET**G**V**F**M**R**NS**R**G**AE**I**CS**LY**D**K**D**AL**V**Q**LV**ET**G**G**A**HPL**S**S**REP**IT**ES**M**I**M**R**K**DE**CH**F**D**T**K**RE**A**F**CC**K---- 114-209  
 NleG6<sub>EPE22</sub> LMEK**I**NS**CV**F**R**P**D**SN**H**F**S**CP**E**S**FL**T**CP**IT**L**D**T**P**EN**G**V**F**M**R**NS**R**G**AE**I**CS**LY**D**K**D**AL**V**Q**LV**ET**G**G**A**HPL**S**S**REP**IT**ES**M**I**M**R**K**DE**CH**F**D**S**K**KE**A**F**V**AS**DA**--- 114-211  
 NleG7<sub>SAKAI</sub> LKNK**I**H**S**HS**F**V**V**NP**D**E**F**S**CD**T**Q**FL**K**CP**IT**L**CV**PE**KG**V**FV**K**N**AL**NS**N**ICT**LY**D**K**S**AF**M**N**L**T**RE**HL**P**H**PL**S**S**RE**K**I**V**K**E**M**I**ER**N**M**CY**F**D**T**I**S**Q**H**FI**IM**DA**(8) 111-216  
 NleG7<sub>AEPEC</sub> LMNA**I**H**S**HS**F**N**V**NT**D**E**F**S**CD**K**Q**F**L**E**CP**IT**L**C**I**P**K**Q**G**I**F**V**K**N**T**L**NS**N**ICT**LY**D**K**S**AF**M**N**L**T**RE**HL**P**H**PL**S**S**RE**K**I**V**K**E**M**I**ER**N**M**CY**F**D**T**I**S**Q**H**FI**IM**DA**(8) 111-216  
 NleG7<sub>CIROD</sub> LKSK**I**H**S**HA**F**I**V**NP**D**E**FT**CS**K**Q**Y**L**E**CP**IT**F**CI**P**EN**G**V**F**V**K**N**S**M**D**SK**V**CS**LY**D**K**S**A**I**M**Q**L**R**K**H**H**P**H**PL**S**S**RE**K**I**A**K**E**M**I**D**K**N**N**C**Y**F**D**I**M**N**Q**H**F**R**I**L**D**T**D**-- 111-209  
 NleG8-1<sub>SAKAI</sub> IQNK**I**NS**HA**F**T**V**S**H**Q**D**F**S**C**H**E**Q**H**L**N**CP**IT**L**CI**P**ET**G**V**F**V**R**NA**K**N**SE**I**CS**LY**D**H**N**AL**T**EL**I**R**R**N**A**P**H**PL**S**S**REP**F**V**P**E**M**I**V**S**K**D**CH**F**N**L**I**E**Q**Y**F**C**I**L**A**T(7) 111-215  
 NleG8-2<sub>SAKAI</sub> LLDR**I**NS**NA**F**P**V**S**L**Q**D**F**S**C**T**E**E**H**L**N**CP**IT**L**HI**P**ET**G**V**F**V**R**N**A**R**NSE**I**CA**LY**D**Q**E**AL**T**EL**I**L**R**N**A**L**H**PL**S**S**R**DP**F**A**P**E**M**I**I**S**K**D**CH**F**N**I**T**K**Q**C**F**Y**A**L**P**I**(8) 111-216  
 NleG8<sub>CIROD</sub> VQSR**V**NS**YA**F**S**V**NP**GD**F**PC**S**V**L**H**L**S**CP**IT**L**CV**P**ET**G**V**FV**K**N**A**R**C**SK**V**CS**LY**D**I**S**A**L**T**E**M**L**R**R**N**A**S**HPL**S**S**RE**A**F**T**P**G**M**I**V**H**K**EE**C**N**F**N**T**T**E**Q**H**F**C**I**L**P**R(5) 111-213  
 NleG8<sub>EPE22</sub> VQTR**I**NS**HA**F**T**V**NP**GD**F**PC**C**E**Q**H**L**S**CP**IT**L**CI**P**K**T**G**V**F**V**K**N**A**L**H**SK**V**CS**LY**D**K**D**A**L**S**E**A**I**R**H**N**V**F**HPL**S**S**RE**A**F**S**P**E**M**I**V**G**R**E**E**CY**F**D**L**T**D**Q**R**F**C**I**I**S**G(5) 110-212  
 NleG8<sub>EPEC2</sub> VQTR**I**NS**HA**F**T**V**NP**GD**F**PC**C**E**Q**H**L**S**CP**IT**L**CI**P**K**T**G**V**F**V**K**N**A**L**H**SK**V**CS**LY**D**K**D**A**L**S**E**A**I**R**H**N**V**F**HPL**S**S**RE**A**F**S**P**E**M**I**V**G**R**E**E**CY**F**D**L**T**D**Q**R**F**C**I**I**S**G(5) 110-212  
 NleG10-1<sub>SBONG</sub> ISWK**I**D**L**C**N**F**Q**V**E**SG**S**F**A**C**S**E**E**Y**L**T**CP**IT**M**A**I**P**T**N**G**I**F**V**K**A**S**S**R**S**D**V**CH**L**F**D**K**E**A**F**F**N**V**L**S**L**E**L**R**H**PL**S**Q**E**P**I**R**S**D**M**I**V**R**K**S**E**CY**F**N**T**E**R**D**C**F**T**L**R---- 97-192  
 NleG10-2<sub>SBONG</sub> ISWK**I**D**L**C**N**F**Q**V**E**SG**S**F**A**C**S**E**E**Y**L**T**CP**IT**M**A**I**P**T**N**G**I**F**V**K**A**S**S**R**S**D**V**CH**L**F**D**K**E**A**F**F**N**V**L**S**L**E**L**R**H**PL**S**Q**E**P**I**R**S**D**M**I**V**R**K**S**E**CY**F**N**T**E**R**D**C**F**T**L**R---- 97-192  
 NleG11<sub>SBONG</sub> LVDK**V**D**L**C**S**F**R**P**C**V**D**E**L**S**C**S**E**D**N**L**M**CP**V**M**L**A**V**PE**KG**V**FV**K**T**S**S**Q**S**D**I**C**Q**L**F**D**E**A**A**L**I**Q**L**I**D**G**A**V**H**P**V**S**R**A**P**L**S**A**D**M**I**I**S**K**D**E**C**C**F**D**S**T**K**G**S**F**I**I**P**---- 126-221  
 NleG12<sub>SBONG</sub> VLGK**I**D**A**C**L**F**A**T**E**P**T**G**F**Q**I**P**G**V**H**L**T**CP**IT**L**NI**P**ER**G**V**F**A**R**T**S**L**Q**S**D**V**R**CL**Y**D**S**T**A**L**K**E**L**V**S**R**R**L**P**HPL**S**S**RE**A**I**T**A**A**H**I**V**P**K**E**Q**CH**F**D**P**E**K**G**A**F**I**H**S**A**S**Q**-- 20-118  
 Consensus100% . . . . . F . . p . . h . h . . . . . CPlhh . . Ppptlah + . . . . t . lp . laD . . th . phh . . . . HPlpp . . h . . . hlh . . p . C . ap . p . . a . h . . . . .
