# Supplementary material
Source: PubMed Central journal article supplement (PMC1595455)
Supplement: pnas_0604891103_3.pdf [file pnas_0604891103_3.pdf]

OspD1\_SFLEX  
OspD2\_SFLEX MSVNRDNR (17) FKNKTAP (10) NINGVAK--DIYG---RQIVCRHLIASYWEMNFME T--NGKVNY-QLLSTP-D  
OspD3\_SFLEX NLIPSRKI (17) SLLHSKQ (12) NLNCQVT--DHSG---RLIVCRHLIASYWIAQFNKS--SGHVDY-HHFAFP-D  
EspL1\_SAKAI PIKANHLR (17) HCMKLSK (12) NLNGSAFFSQSPS---DAIFCRHLISLOYALDSLRLN-GKGVNLIKHYSSV-E  
EspL2\_SAKAI PIIKNSASNYVEYISKNNP (11) NLNGKVS--DCNG---EITWCRHLIASYWEFFCSN--SGKIDY-ETFSSP-Q  
EspL3'\_SAKAI PVLIKFLD (14) FTKKQIK (7) VDYNCLLHFTGKPK---SLIECRHFALQYCIDSMNE-HTGKVP LKAY YSSP-E  
EspL4\_SAKAI PIFEEYLM (14) LNLNSDR (7) VKLNGQCYFPGRPQ---NRIVCRHIAAOYINDIYQN-VDYKPHQ-DDYSSA-E  
EspL4\_EAEC PARIKFLD (14) FTKKQIK (7) IKYNCKLFFNEKPE---NKIECRHLISLOYCIDSMNE-HSGKVPLKAY YSSP-E  
EspL5\_RRSL --MERE GP---AASKETP (10) DLNGQIL--LTPD (5) DRILWCRHLIARAYQRAAEDD-DNGKEDF-SRFAMVGE  
ESPL6\_YPSE PTFDKSKPYISELKSREEK---NLNGEVNFKDNVD---KLIMCRHLISSQYILDSLSDDEDTKGVLDL-DKFSK-D  
01003153\_YPSE PVYDKNNG---DSTL KETE (10) RLGEQAY--EYSG---GDISNYHLSIQYIMDV LADQAKGVLDL-SHFSSE-E  
Q66EA0\_YPSE PVIYDKNS---DNLT KETE (10) RLGEQAY--EYSG---GDISNYHLSIQYIMDV LADQAKGVLDL-SHFSSE-E  
Ent\_STEC PIIKNSASNYVEYISKNNP (11) NLNGKVS--DCNG---EITWCRHLIASYWEFFCSN--SGKIDY-ETFSSP-Q  
Consensus/80% .b.p.....cp.....pbs..h.....s.....l.sbHlt.ba.....p.pt+hsb...at...p

OspD1\_SFLEX  
OspD2\_SFLEX AIAKNVCLKTEDFS---KS---PAYIYFVENKKGTVITNFFYNMKNKNGDFVRTLSACTLN---HQMALGLKI  
OspD3\_SFLEX EIKNYVSVSEEEKAI---NV---PAIYFVENGSWGDIFIFYIFNEMIFHSEKSRALISTSN---HNMALGLKI  
EspL1\_SAKAI SIQQHVPLVRDAEFR---AL (4) PAGSRVIASKDFGFALDIFCRMMANNVSHMSAILYIDN---HTLSVRLRI  
EspL2\_SAKAI LLSKAIIVIQENKGTN---NI---KGDVYFVENESWGSVIYNLFLQLEKENKSHTSLEVHSPG---HAMALGLKI  
EspL3'\_SAKAI DIQKHIPFELEQQFN---NL (4) PPGTCVVASDKFGEALSVFFHRMEKEKLTHTMTAIVQSQT---HAMAVRLRI  
EspL4\_SAKAI KFLTHEFNKCKNQTL---AL (4) PEGRCVAACGDFGLVMKAYFDKMESNDLSVMAAILLVDN---HALTVRLRI  
EspL4\_EAEC DIQKHIPFELEQQFH---NL (4) PPGTCVVASDKFGEALSVFFORMEKEKLTHTMAAIVQSQT---HAMAVRLRI  
EspL5\_RRSL PHYDNFVDRARDNY (6) NL (4) AMQRTVIDGDRFGVFLGEAFKELASTGKNHATAILVTAN (13) HALSVSMRI  
ESPL6\_YPSE IIANRITSNVEELYE---QLQLQAKEIYFIPNNEFGICLSKIFKSMERKSENTQSILLESFN---HAMAVRLRI  
01003153\_YPSE TLSSHVSLEKNEHNY---HC (4) ASTVYHINNDNFGRITLVDLFEQMNNSENGVRLKIDSSQ---HSMARLYI  
Q66EA0\_YPSE TLSSHVSLEKNEHNY---HC (4) ASTVYHINNDNFGRITLVDLFEQMNNSENGVRLKIDSSQ---HSMARLYI  
Ent\_STEC LLSKAIIVIQENKGTN---NI---KGDVYFVENESWGSVIYNLFLQLEKENKSHTSLEVHSPG---HAMALGLKI  
Consensus/80% .b.p.hs.p.pp.....h.....hhl.s.pat.hl.ba.pb.p.ph.shbl.s.....+sbth.lbI

OspD1\_SFLEX  
OspD2\_SFLEX KRVOESEK--WVVFQFDPNRTVTHKR (4) CDSHFELSQLSAKDFDFD-YWKIYGL-EQPGQVIFEDRHNSPLTN  
OspD3\_SFLEX KETKNGGD--FVIQLYDPNHTATHLR (4) KFNLAIKKLTVDNDFLEK-HQKCYGL-ISDGMISFVDRHTPTSMS  
EspL1\_SAKAI QQSAYQLN-YVVSVDPNNTNVAVR---GTHRTARGFLSLDKFISGGPDAQTWAD (7) IAILPLLEPGVPGAIF  
EspL2\_SAKAI KNDKENK---FVINFYDPNQATATHKR (4) TNNICDIINLTAYDFLSEQ-CLKCYGL-KEDTSLSFVDKTKSNDNN  
EspL3'\_SAKAI KKT PAGE TE-YVVSFYDPNATNTAVRYK-ANNCDSEFG--SLQSFINIQQAKQKVI (7) VGITPYLPREQAHLLS  
EspL4\_SAKAI KNTTEGCIH-YVVSVDPNVNTDKIRIM-SESKEDIKHYSLMDFMNVDYSLKWSN (7) VAIIPALPKEQLMLLK  
EspL4\_EAEC KKT PAGE KE-YVVSFYDPNATNTAVRYK-ANNYDSFG--TLQSEFMNINQETQKVV (7) VGITPYLPREQAHLLS  
EspL5\_RRSL KQDGESRDV-YVARVYDPNRTVTHKRVR-VTDLQLLERLTFHDFLTD---VDYGR---PSVLTVVS PSLSLHED  
ESPL6\_YPSE KENENNNTKR YVISVDPNMNTVVRCE-VDDLKLVKRDVQVDFINHHLFGNFYKS (7) EISTLYICKK PANESV  
01003153\_YPSE KNT EQQR--FVVNFYDPNITDKTVRCE-VDDALKLNGYSLRNFI SNQTYLSSYVD-AEIS IIVCDQADIHQH  
Q66EA0\_YPSE KDTEQQR--FVVNFYDPNITDKTVRCE-VDDALKLNDYSLRNFI SNQTYLSSYVD-AEIS IIVCDQADIHQH  
Ent\_STEC KNDKENK---FVINFYDPNQATATHKR (4) TNNICDIINLTAYDFLSEQ-CLKCYGL-KEDTSLSFVDKTKSNDNN  
Consensus/80% +ps..sp...aVlphaDPN.Ts.h.+...sps...b...ph.sabs.....as.....s...hhsp.....

[-----ANK

OspD1\_SFLEX  
OspD2\_SFLEX TVK---LLPDELINSRVYHAIKTNL TEVLFILMEKYKN-G---EISQSKLVNLLATRS SDGTPAFYIALQNGYS  
OspD3\_SFLEX SII---RWPDNLLHPKVIYHAMRGLTELIQKVT RVVQL-S---DLSDNTELELLA AKNDDGLSGILLALQNGHS  
EspL1\_SAKAI TGIAT-RMPFAPIHPSAMLLIMATGQTQQLITLFRQLPILP---EK---EIEIITAQNSIGTPALFLAMNGHT  
EspL2\_SAKAI NVFIK-KLPDNIQGVVINFAMGAGLREI IKKVNDRTRF-T---DLTKSQMKILCESKNVNNVPGLLALQNGHD  
EspL3'\_SAKAI GIENE-LQP--PLSPALFLLMRGIIKYNIVLFFDKLKNQSQ---EMTASKALDLA AKSPGEGYGLCVLLYHNTI  
EspL4\_SAKAI GTVDE-ITP--PLSPATMNLMLAIGQNHQLKQMLIQLKMP---EL---HRTEMLTAYNSINLPGLYLAINYGNA  
EspL4\_EAEC GINNE-LQP--PLTPSALFLLMRGITHENIVLFFDKLKKSQ---EMTASKALETLA AKSMTGT YGLYVLLYHNNT  
EspL5\_RRSL PAL (1) RTGDATLKG-RLHLAMQANMPWEVRAVARQLRN-P (4) NLSDEERIALLAGKDTSGATALGAAMLWGYV  
ESPL6\_YPSE PEC (8) DWIALPASSINLYTFLIEGFSQEIKNLKNQLEIY---KKNPEKLMELTAKSPDGMGFEQALLNDHA  
01003153\_YPSE KVK (9) QSSPLPLS AARLDLLLTDNFAVGIQKMAEEVKNLS-ESERKV-FFNQLLQ PRAKDDVPGLQCAFHQCF  
Q66EA0\_YPSE KVK (9) QSSPLPLS VARLDLLLTDNFAAGIQTMAEEVKNLS-ESERN-FFNQLLQ PRAENDLSGLQCAFNYQCF  
Ent\_STEC NVFIK-KLPDNIQGVVINFAMGAGLREI IKKVNDRTRF-T---DLTKSQMKILCESKNVNNVPGLLALQNGHD  
Consensus/80% .h....b.s...lps..b.bhb..sb...l..hhpph.....cb...b...lh.sps..sh.tlhbhb..sp.

-----] [-----ANK-----]

OspD1\_SFLEX DAARYGESLL---AAEIPKEEKLEVI AARNNAG-ESALFIALQEGHSAAIQAYGDFIKTFDLSPK 84-156  
OspD2\_SFLEX DIIQVYGIKLN---MCNLSQETITLLAAVANN-VPLGCMSEFMNGHVDTIKAYGEIVFKTPLTSD 25-376  
OspD3\_SFLEX DTLIAYGELLE---TSGLNLDKTVELLTAEGMGGRI SGLSQALONGHAETIKAYGRLLKRAINIE 5-359  
EspL1\_SAKAI DNVKIFMQEIQ (4) NHIHEDNLVKLLQTKSANE-TPGLYISMLYGFDEIIDIFLNALTTPIAQEL 110-478  
EspL2\_SAKAI NVIDEYGTLIK---KSNLNKEELIHILSARTLDGTPGLYQALQNGHAQAIKSYGNLVLDITINKNI 2-343  
EspL3'\_SAKAI DKFNDYITNLK (4) KYNFSQEDLETLLAKDNLG-VSWIPRALKNNQNKIVKAWLLAIDDFEKEFG 106-468  
EspL4\_SAKAI DIVETIENSLS (4) EGLLSKKNLMMHILEAKDKNG-FSGLFLAISRKDNVVTSLNALPKLAATHH 101-461  
EspL4\_EAEC YKFNEYIINLK (4) KYNFSYGDLENILLAQDKHG-VSWIPAALENNQKEI IKAWLLAIDDFEKEFG 105-467  
EspL5\_RRSL DAMAMYGLTLR---ESDLKPAQAELLA AKDAEG-VPALQLAVQNGHEDTVSEYKLVFCSGLDPE 1-362  
ESPL6\_YPSE DAINAFGELLQ---LV---PENKRELLVNNKTK-YTLFDIVCSREKNTTMAFKNIVLSIKNER 22-370  
01003153\_YPSE EALEAYGELLA---LA---PPEQRADLLTAESENG-YITMPWVIVSSGNPELVDFEFTLSRLLPLNDM 9-358  
Q66EA0\_YPSE DALEAYSALLV---LA---PPEQRADLLTGKSENG-WSSLAQAMSSGNSDMVSVCFYLLQWPLDDM 9-358  
Ent\_STEC NVIDEYGTLIK---KSNLNKEELIHILSARTLDGTPGLYQALQNGHAQAIKSYGNLVLDITINKNI 2-343  
Consensus/80% s.hp.ah..l.....s.cpb.pll.tps..s.hshl.btbpssp.phlpsah.hl.....p..
