# Supplementary material
Source: PubMed Central journal article supplement (PMC1595455)
Supplement: pnas_0604891103_4.pdf [file pnas_0604891103_4.pdf]

OspE1<sub>SFLEX</sub> LPQKQENIIL-----EVSNPV-----LLSSTVTTDGYTVFNKKAAYELQIPAAAS-RTKTLKFTATEMQWLTKINEAGIDEKQS- 10-82  
 EspO1-1<sub>SAKAI</sub> MPFSIKNRFSSQVHYPEISGPIKDKPASKNCILTSTTCNVDSYTVYQKKACSFDMRPPGAGERTPKLKL SVTEMTWLSKTIETEIHNTKE- 1-91  
 EspO1-2<sub>SAKAI</sub> MPFSIKSIFSGHTWHQPEISRPIADKSSTKNCILDSTTCNV DGF TVFNRRSCSFDMRPPGSADRT PQLRLSISEVAWMSKIIETE TNNTNKS 1-92  
 EspO1<sub>STYM</sub> MPFSIKNICSGPKGHCPEISSPIQDKPVPRNCTLTSTTCDIQSYTVFSRWSCSYEMRPPGAEERTPRLKFSATELSWLSKTIETERRNTKE- 1-91  
 EspO1<sub>SENT</sub> MPFSIKNICSGPQGHYPEISRPIQNKPVPRNCTLISTTCKIQEYTVFSRCSCSFEMRPPGTEERTPRLKLSATELSWLSKTIETEMRNTKE- 1-91  
 EspO1<sub>O103:H2</sub> MPLSIGSCFSCHTGRRPEISDP IIDK PSTKNCELISTTCNV DGITVISRSSYGFDMKPPGAGERAPRLKLSASEAQWMAAIDAEGHNISNT 1-92  
 EspO1<sub>EPE22</sub> MPFSIKNI FNSKGSYPEISGPVQDKPVSKNCTLTSTTCMNDYTVFSRKSCTFDMRPPGAGDRTPQLKLSASELIWLSKTI DTERNNIKE- 1-91  
 EspO1<sub>AEPEC</sub> MPFSIKNI FNSKGNYP EISGPVQDKPVSKNCTLTSTTCPMNDYTVFSRKSCTFDMRPPGAGDRTPKLKLAATEMTWLSKTIETEIHNTKE- 1-91  
 EspO1<sub>CIROD</sub> MPLSIRNI FRASTRPEISGPVIDKPIPKNCTLISTTCNLDGIMVINRRTSFYDIKPPGAGERQPSLKISASEAQWMCKIETEINNSNK- 1-91

Consensus/80% bPbp1csbhp..psp.sElps sls+s.s+ss.LhSpps shpsbpVbs+pts.aDb+sPtt.-+sspL+b\*t\*EhpWbs+h1-s-bps.pp.
