# Supplementary material
Source: PubMed Central journal article supplement (PMC1595455)
Supplement: pnas_0604891103_6.pdf [file pnas_0604891103_6.pdf]

EspY1<sub>SAKAI</sub> MKVSVPGMP---ATLLN**MSNND**IYKMVSGDKMDMKMNI**FQRLWETLRHLFWSDKQTE-AYKLLFN**FV  
 EspY2<sub>SAKAI</sub> MKVRNPEQ (7) TTKDPGL**TNSQ**IIRMANLV**VKKTENMNI****FEE**LWETLRNLF**QSDKHSQTAA**RQ**ILKDA**  
 EspY5'<sub>SAKAI</sub> MSVGN-----EEKYS**ITHKD**ITNL---**IAGDRQSFLKLT**LW**EFILDLF**PMY**HIKE-AKETIVE**EFV  
 EspY4<sub>SAKAI</sub> MYKERLSH (12) DKKYN**VNSKD**IENI---**LDGKGD**L**FKKRTLW**EF**VRDLFP**G**SHIKE-VKGLIYE**EFV  
 EspY3<sub>SAKAI</sub> MMKTITKQP---ILFTD**VPVAD**LRNS---**MKQDLNQN**L**IERLWNKIR**DF**FLDSDKQK-AFKS**I**HKYI**  
 SopD<sub>SALTY</sub> MPVTL**SFG**---NHQNYT**LNESRLAHL**---**LSADKEKA**I**HMGGW**DK**VQDHF**RA**EKKDH-ALE**V**VLHSII**  
 SspH2<sub>SALTY</sub> MPFHIGSG----CLPAT**ISNRR**IYRI---**AWSDT--PPEMSS****WEKMK**EFF**CS**TH**QTE-ALE**C**IWTIC**  
 SseI<sub>SALTY</sub> MPFHIGSG----CLPAI**ISNRR**IYRI---**AWSDT--PPEMSS****WEKMK**EFF**CS**TH**QAE-ALE**C**IWTIC**  
 SseJ<sub>SALTY</sub> MPLSVGQG----YFTSS**ISEK**FNAI---KESAR--L**PELSL****WEKIKAY**FF**TTH**HA**E-ALE**C**IFNLY**  
 sifA<sub>SALTY</sub> MPITIGNG----FLKSE**ILTNS**P-----RNT**KE--AWWKV**L**WEKIKD**FFF**STG**K**AK-ADR**CL**HEML**  
 sifB<sub>SALTY</sub> MPITIGRG----FLKSE**MFSQS**-----**AISQR--SFF**TL**WEKIKD**FF**CDT**QR**ST-ADQ**Y**IKELC**  
 slrP<sub>SALTY</sub> MFNITN-----IQST**ARHQS**ISNE---**ASTE**V--**PLKEE**I**WNKIS**AFF**SSE**H**QVE-AQN**C**IAYLC**  
 SspH1<sub>SALTY</sub> MFNIRN-----TQPS**VSMQ**A**IAGA--AAPEA--SPEE**I**VWEKI**Q**VFF**FP**QENYEE-AQQ**CL**AELC**  
 SG1856<sub>SODGL</sub> MAMTIKSN-TLPF**ISETISD**AR**IAYVK-NLAM**T**KEDAT**VM**RIW**DK**IKD**W**FCG**TR**KKKE-ALG**H**IYDLT**  
 72NO-3<sub>EDWIC</sub> MLPLPHSG----LFSRN**LSRND**ISLVK**NATD**IGHIG**SRFN**RI**VNKV**LD**WCCNT**KK**TE-AME**Q**LFIVM**  
 CV2292<sub>CHRV1</sub> MPHTMSSS (5) RQSAF**LSNER**AARM---**MSGDKQTATHMGL****WDR**FK**DLFRSE**KK**QD-ALN**AL**FDLV**  
 Consensus/80% b.....h.ppp.....h..p...s.bb.la-plpsba.spcp.c.tbphlbpbh
