# Supplementary material
Source: PubMed Central journal article supplement (PMC1595455)

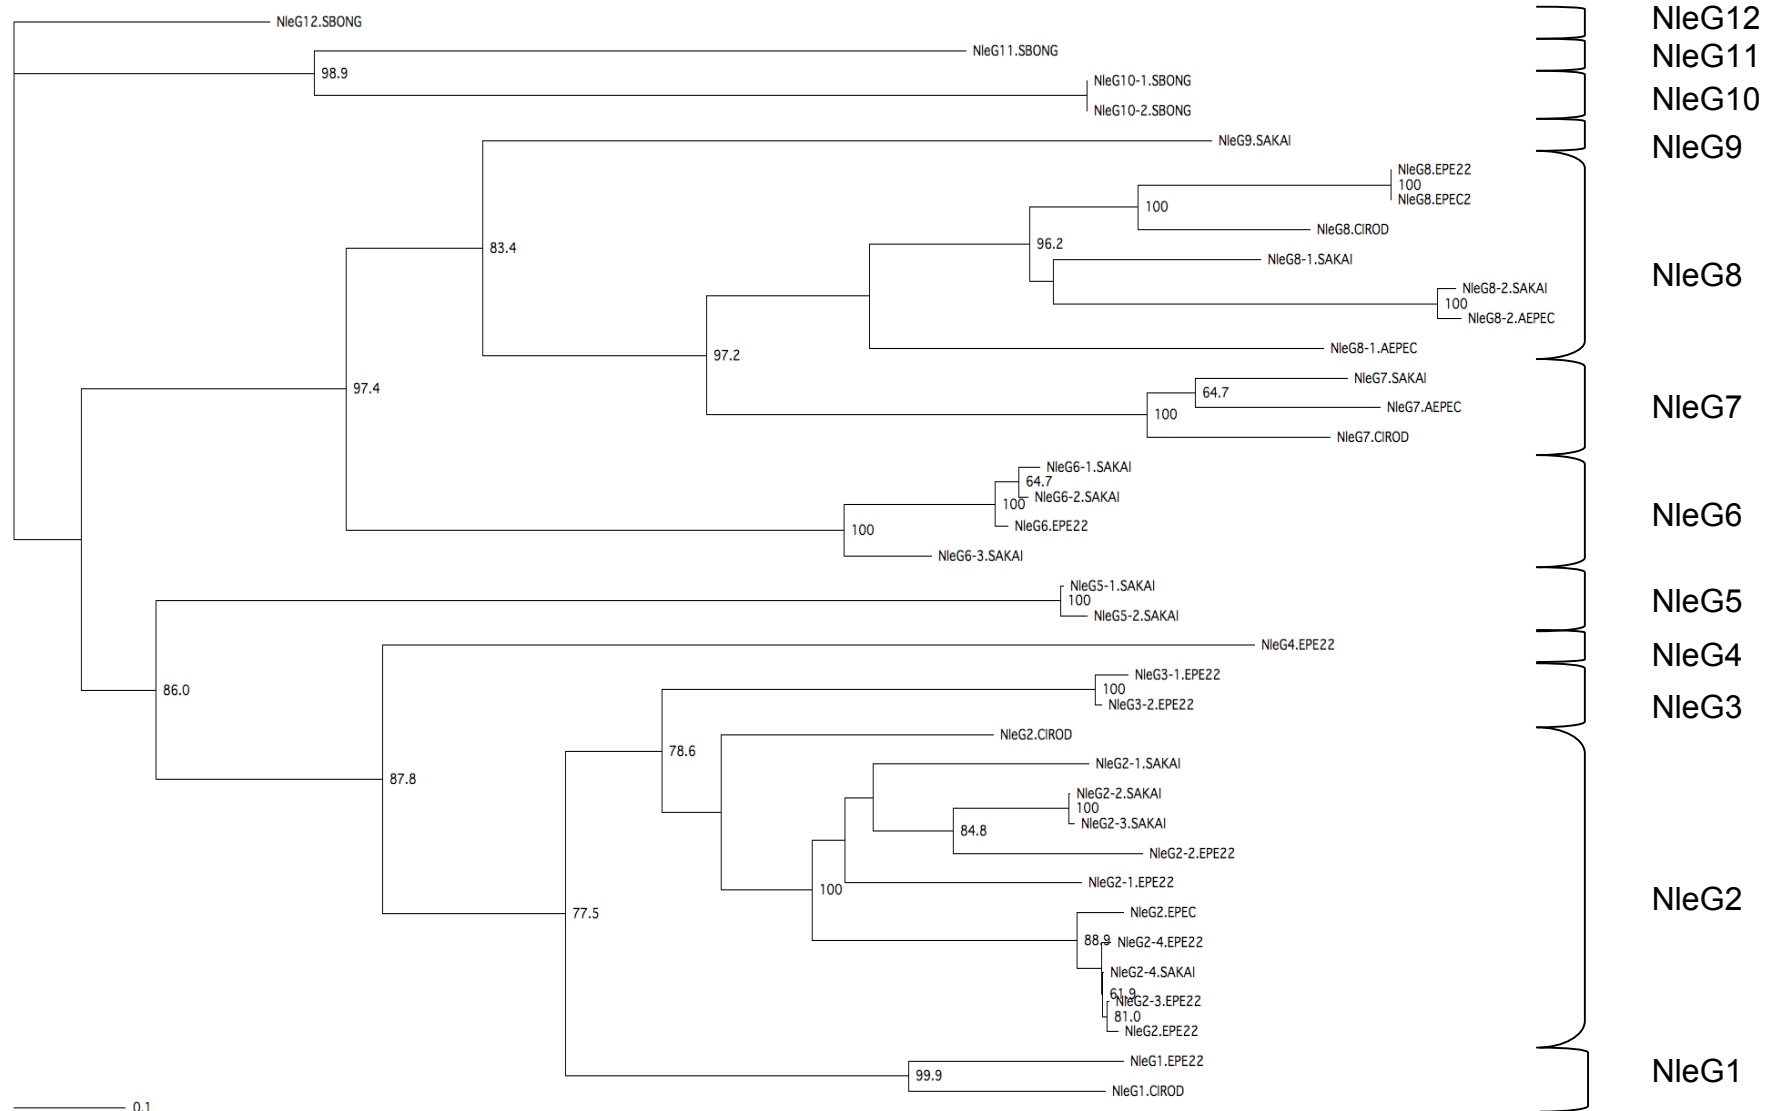

Supplement: pnas_0604891103_2.pdf [file pnas_0604891103_2.pdf]
